# Supplementary material for: Carriers of Loss-of-Function Mutations in ABCA1 Display Pancreatic β-Cell Dysfunction
Source: PubMed Central journal article supplement — Diabetes Care. 2010 Jan 12;33(4):869–74. doi: 10.2337/dc09-1562 (PMC2845043; doi:10.2337/dc09-1562), 2010-01-12
Supplement: supp_dc09-1562_dc09-1562_Online_appendix.pdf [file supp_dc09-1562_dc09-1562_Online_appendix.pdf]

**Online appendix, Table A. Hyperglycemic clamp baseline characteristics**

|                                  | <b>Non-carriers</b> | <b>Carriers</b>  | <b>P-value</b> |
|----------------------------------|---------------------|------------------|----------------|
| <b>N</b>                         | 8                   | 8                |                |
| <b>Age (years)</b>               | 54 ± 11             | 52 ± 12          | 0.78           |
| <b>Men, n (%)</b>                | 4 (50%)             | 4 (50%)          | 1.00           |
| <b>Body mass index</b>           | 24.5 ± 3.2          | 25.1 ± 3.0       | 0.68           |
| <b>Cholesterol (mmol/L)</b>      |                     |                  |                |
| total                            | 5.05 ± 1.38         | 4.47 ± 0.57      | 0.30           |
| LDL                              | 3.10 ± 1.13         | 3.28 ± 0.52      | 0.70           |
| HDL                              | 1.62 ± 0.38         | 0.65 ± 0.39      | <0.001         |
| <b>Triglycerides (mmol/L)</b>    | 0.76 [0.50-0.92]    | 0.90 [0.65-1.92] | 0.28           |
| <b>Fasting glucose (mmol/L)</b>  | 4.7 ± 0.6           | 4.7 ± 0.5        | 0.88           |
| <b>Fasting insulin (pmol/L)</b>  | 45 ± 26             | 34 ± 20          | 0.33           |
| <b>Fasting glucagon (pmol/L)</b> | 54 ± 12             | 49 ± 20          | 0.52           |
| <b>HbA1c (%)</b>                 | 5.5 ± 0.3           | 5.5 ± 0.5        | 0.99           |
| <b>History of CAD, n (%)</b>     | 0 (0)               | 2 (25)           | 0.45           |
| <b>History of DM</b>             | 0 (0)               | 0 (0)            | N/A            |
| <b>Family history of DM</b>      | 1 (13)              | 0 (0)            | 0.86           |
| <b>Smokers, n (%)</b>            | 1 (13)              | 1 (13)           | 1.0            |
| <b>Medication use, n (%)</b>     |                     |                  |                |
| Statins                          | 1 (13)              | 4 (50)           | 0.14           |
| HRT                              | 0 (0)               | 0 (0)            | N/A            |
| Thiazides                        | 0 (0)               | 0 (0)            | N/A            |
| Beta-blockers                    | 1 (10)              | 1 (10)           | 1.00           |

Baseline characteristics of participants in hyperglycemic clamping experiment. Data are presented as means ± SD, number (%) or median [interquartile range]. CAD = coronary artery disease, HRT = hormone replacement therapy.
